# Supplementary material for: Seroprevalence and Risk Factors of Anaplasma spp. in German Small Ruminant Flocks
Source: MDPI journal article supplement (doi:10.3390/ani11102793), 2021-09-25
Supplement: s1 [file s1]

## Supplementary Materials

**Table S1.** Univariable risk analysis at animal level for exposure to *Anaplasma* spp.

| Variable | Category | Apparent<br>Prevalence<br>of Positive<br>Animals/<br>Animals Total<br>(%) | Odds Ratio<br>(OR) | 95% Confidence<br>Interval | p-Value | Quasilikelihood<br>under the<br>Independence<br>Model Criterion<br>(QIC) |
|----------|----------|---------------------------------------------------------------------------|--------------------|----------------------------|---------|--------------------------------------------------------------------------|
| Species  | Goat     | 127/447                                                                   | 2.482              | 1.418–4.344                | 0.002   | 4355.870                                                                 |
|          | Sheep    | 1336/2731                                                                 |                    |                            |         |                                                                          |
| Sex      | Male     | 151/399                                                                   | 1.373              | 1.027–1.834                | 0.032   | 4401.188                                                                 |
|          | Female   | 1312/2779                                                                 |                    |                            |         |                                                                          |
| Age      | >2 years | 1294/2768                                                                 | 0.753              | 0.578–0.980                | 0.035   | 4408.810                                                                 |
|          | ≤2 years | 169/410                                                                   |                    |                            |         |                                                                          |

**Table S2.** Univariable risk analysis at flock level for the risk of having an *Anaplasma* spp. intra-flock seroprevalence of above 20%.

| Variable                   | Category           | Apparent<br>Prevalence of<br>Positive<br>Farms/Farms<br>Total (%) | Odds<br>Ratio (OR) | 95%<br>Confidence<br>Interval | C-p-<br>Value | LR-p-<br>Value | Akaike<br>Informati<br>on<br>Criterion<br>(AIC) |
|----------------------------|--------------------|-------------------------------------------------------------------|--------------------|-------------------------------|---------------|----------------|-------------------------------------------------|
| Husbandry<br>system        | Paddock            | 44/56                                                             | 1.811              | 0.344–9.539                   | 0.484         | 0.465          | 64.784                                          |
|                            | No Paddock         | 13/15                                                             |                    |                               |               |                |                                                 |
| Landscape<br>conservation  | No                 | 15/23                                                             | 4.057              | 1.138–14.459                  | 0.031         | 0.028          | 60.489                                          |
|                            | Yes                | 42/48                                                             |                    |                               |               |                |                                                 |
| Location                   | Forest edge        | 44/53                                                             | 0.531              | 0.150–1.886                   | 0.328         | 0.336          | 64.391                                          |
|                            | Others             | 13/18                                                             |                    |                               |               |                |                                                 |
| Infestation with<br>ticks  | No                 | 12/15                                                             | 1.012              | 0.237–4.324                   | 0.987         | 0.987          | 65.317                                          |
|                            | Yes                | 45/56                                                             |                    |                               |               |                |                                                 |
| Ectoparasitic<br>treatment | No                 | 21/27                                                             | 1.282              | 0.396–4.145                   | 0.678         | 0.678          | 65.147                                          |
|                            | Yes                | 36/44                                                             |                    |                               |               |                |                                                 |
| Injections                 | No injections      | 8/9                                                               | >999.999           | <0.001 >999.999               | 0.993         | 0.375          | 65.355                                          |
|                            | No needle change   | 3/3                                                               |                    |                               |               |                |                                                 |
|                            | No injections      | 8/9                                                               | 0.446              | 0.051–3.865                   | 0.464         |                |                                                 |
|                            | With needle change | 46/59                                                             |                    |                               |               |                |                                                 |
| Cattle                     | No                 | 36/46                                                             | 1.446              | 0.409–5.112                   | 0.567         | 0.560          | 64.978                                          |

|                       |                                |       |          |                 |       |       |        |
|-----------------------|--------------------------------|-------|----------|-----------------|-------|-------|--------|
|                       | Yes                            | 21/25 |          |                 |       |       |        |
| Swine                 | No                             | 51/64 |          |                 |       |       |        |
|                       | Yes                            | 6/7   | 1.510    | 0.171–13.358    | 0.711 | 0.699 | 65.168 |
| Poultry               | No                             | 29/37 |          |                 |       |       |        |
|                       | Yes                            | 28/34 | 1.277    | 0.397–4.107     | 0.682 | 0.681 | 65.148 |
| Wild birds            | No                             | 5/6   |          |                 |       |       |        |
|                       | Yes                            | 52/65 | 0.798    | 0.087–7.303     | 0.841 | 0.838 | 65.276 |
| Deer                  | No                             | 12/13 |          |                 |       |       |        |
|                       | Yes                            | 43/58 | 0.295    | 0.036–2.451     | 0.258 | 0.193 | 63.625 |
| Dogs                  | No                             | 1/3   |          |                 |       |       |        |
|                       | Yes                            | 56/68 | 8.705    | 0.761–99.505    | 0.082 | 0.073 | 62.102 |
| Cats                  | No                             | 22/32 |          |                 |       |       |        |
|                       | Yes                            | 35/39 | 3.893    | 1.094–13.850    | 0.036 | 0.028 | 60.456 |
| Rodents               | No                             | 7/10  |          |                 |       |       |        |
|                       | Yes                            | 50/61 | 1.906    | 0.436–8.323     | 0.391 | 0.407 | 64.629 |
| Lambing<br>behaviour  | Seasonal                       | 38/47 |          |                 |       |       |        |
|                       | Aseasonal                      | 19/24 | 0.844    | 0.201–3.538     | 0.817 | 0.817 | 65.264 |
|                       | No increased<br>abortion rates | 51/65 |          |                 |       |       |        |
| Abortion              | Increased abortion<br>rates    | 5/5   |          |                 |       |       |        |
|                       |                                |       | >999.999 | <0.001 >999.999 | 0.994 | 0.129 | 62.561 |
| Pneumonia<br>in lambs | No                             | 48/61 |          |                 |       |       |        |
|                       | Yes                            | 9/10  | 2.458    | 0.285–21.209    | 0.413 | 0.368 | 64.506 |
| Diseases<br>in dams   | No                             | 48/61 |          |                 |       |       |        |
|                       | Yes                            | 9/10  | 2.412    | 0.280–20.751    | 0.423 | 0.378 | 64.541 |
